# Supplementary material for: Intertillage during Natural Farming Rice Paddy Production Negatively Impacted the Microbial Abundances in Soils but Not Diversities
Source: Hindawi journal article supplement (doi:10.1155/2021/6676456), 2021-02-03
Supplement: f1 [file 6676456.f1.zip]

Archive with 3 entries (3 files):
- 6676456.f1/~$pplementary Decscription.docx
- 6676456.f1/Appl Environ Soil Sci_supplementary figures.docx
- 6676456.f1/Appl Environ Soil Sci_tables.docx
