# Supplementary material for: Intertillage during Natural Farming Rice Paddy Production Negatively Impacted the Microbial Abundances in Soils but Not Diversities
Source: Hindawi journal article supplement (doi:10.1155/2021/6676456), 2021-02-03
Supplement: f1 [file 6676456.f1.zip › 6676456.f1/Appl Environ Soil Sci_supplementary figures.docx]

Supplementary figures


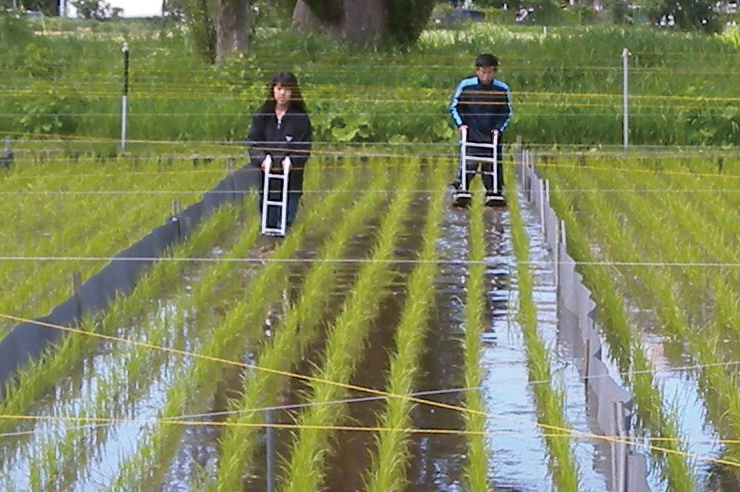


Supplementary Photo 1. The inter-tillage machine used to remove weed in five-times inter-tillage plots.


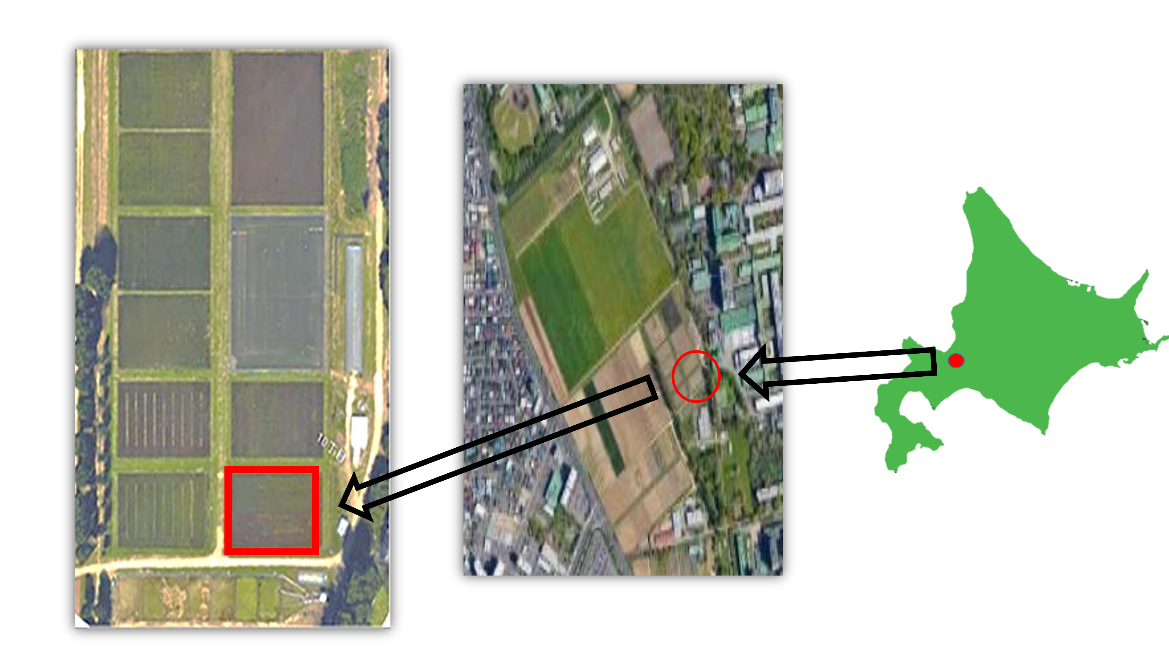


Fig S1. The sampling site. the Field Science Centre of Hokkaido University, Sapporo, Japan (N43°04′39"151, E141°20′03"634).


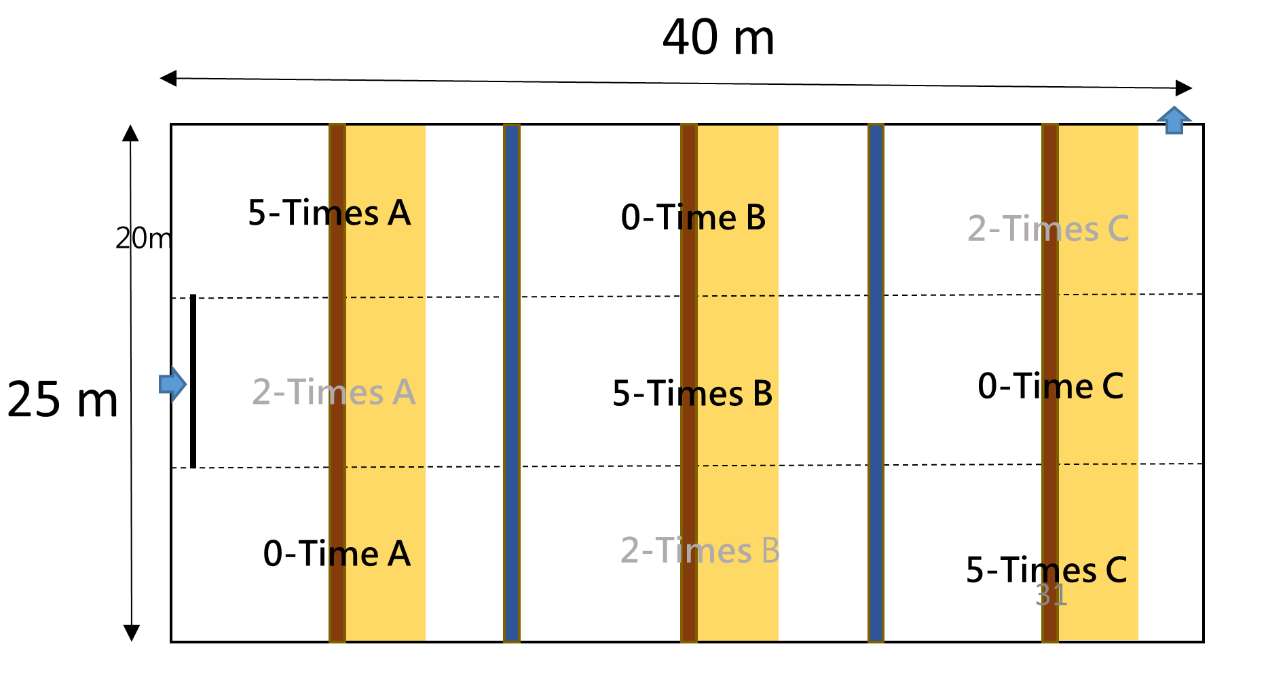


Fig S2. The experimental site of natural farming rice paddy. It was divided into nine plots and A, B, C blocks. Panels were set within block (brown) and between blocks (blue). Each plot was separated with polycarbonate board. Each block including 0- (No-tillage; NT), 2- (2 times inter-tillage; 2T) and 5- (5 times inter-tillage; 5T) treatments, where soils were sampled at NT and 5T plots. Each treatment had three replicates.


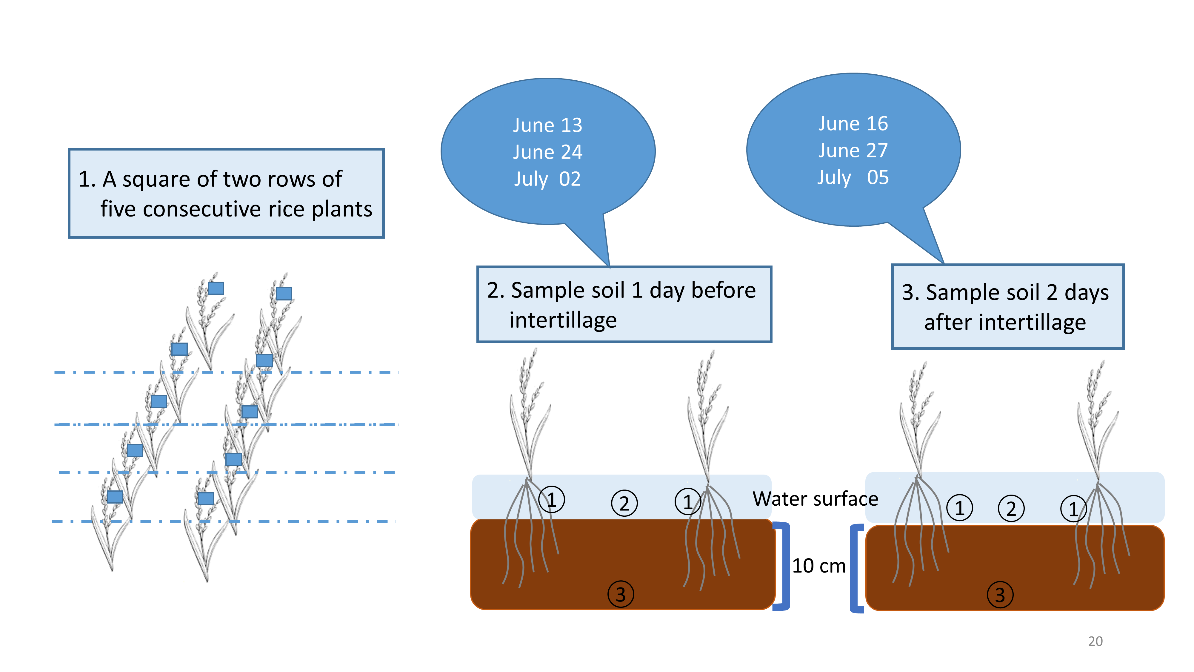


Fig S3. Soil samples were taken from: ① rice proximity; ② soil surface; ③ 10 cm depth one day before and two days after management activities for the third, fourth and fifth inter–tillage event in 5T and NT plots.
