# Supplementary material for: Intertillage during Natural Farming Rice Paddy Production Negatively Impacted the Microbial Abundances in Soils but Not Diversities
Source: Hindawi journal article supplement (doi:10.1155/2021/6676456), 2021-02-03
Supplement: f1 [file 6676456.f1.zip › 6676456.f1/Appl Environ Soil Sci_tables.docx]

Tables

**Table S1. PERMANOVA (Permutational multivariate analysis of variance) tested effect results of vegetative phase, location and treatment on bacterial community composition.**

| Pairwise comparison | DF | SS | F | R2 | P value |
| --- | --- | --- | --- | --- | --- |
| Vegetative phase |  |  |  |  |  |
| June vs July | 1 | 1.421286 | 8.02184 | 0.190897 | 0.001 |
| Location |  |  |  |  |  |
| Proximity vs Surface | 1 | 0.156729 | 0.78602 | 0.034496 | 1 |
| Proximity vs 10 cm | 1 | 1.068200 | 6.84868 | 0.237400 | 0.003 |
| Surface vs 10 cm | 1 | 1.305654 | 7.76662 | 0.260917 | 0.003 |
| Treatment |  |  |  |  |  |
| NT vs 5T | 1 | 0.242106 | 1.14277 | 0.032517 | 0.274 |

**Table S2. Results of ANOVA for Shannon index at the OTU level.**

|  | DF | SS | MS | F value | P value |
| --- | --- | --- | --- | --- | --- |
| Vegetative phase | 1 | 13.16 | 13.156 | 23.47 | *** |
| Location | 2 | 3.121 | 1.5606 | 1.75 | ns |
| Treatment | 1 | 0.134 | 0.1338 | 0.14 | ns |

**Table S3. Shannon index at OTU level. Each score was shown as mean (SD).**

|  |  | NT |  | 5T |
| --- | --- | --- | --- | --- |
| Vegetative phase | Location | mean (SD) |  | mean (SD) |
| Early | Rice proximity | 7.12±0.48 |  | 7.89±0.48 |
| Soil surface | 7.30±0.03 |  | 7.36±0.42 |
| 10 cm depth | 9.25±0.23 |  | 9.34±0.23 |
| Late | Rice proximity | 9.58±0.26 |  | 9.61±0.12 |
| Soil surface | 9.33±0.27 |  | 9.45±0.50 |
| 10 cm depth | 8.89±0.33 |  | 9.03±0.30 |
